# Supplementary material for: Validity and Sensitivity of an Inertial Measurement Unit-Driven Biomechanical Model of Motor Variability for Gait
Source: MDPI journal article supplement (doi:10.3390/s21227690), 2021-11-19
Supplement: s1 [file s1]

**Supplementary Figures S5–S9: Bland-Altman plots of joint angle range of motion and joint angle variability outcomes**

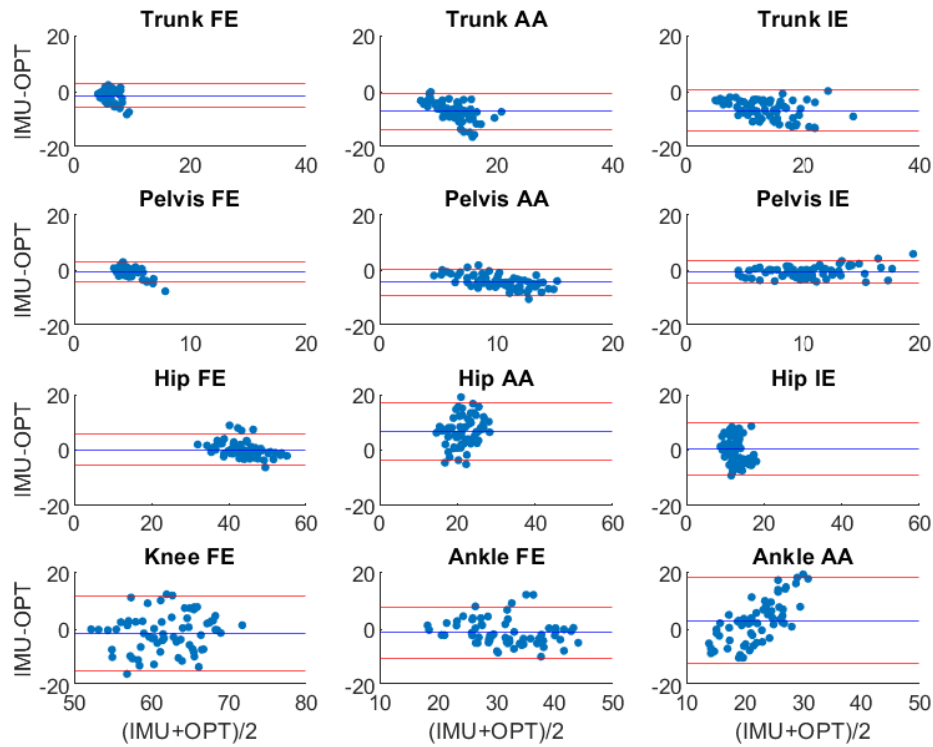

Figure S5. Bland-Altman plots of range of motion (ROM) of trunk, pelvis, and lower-limb joint angles for the optoelectronic-driven (OPT) and IMU-driven biomechanical models of constant-speed treadmill gait. Mean bias (blue line) and 95% limits of agreement (red lines) are shown. Values are in degrees ( $^{\circ}$ ). Angles include flexion/extension (FE), abduction/adduction (AA), and internal/external rotation (IE).

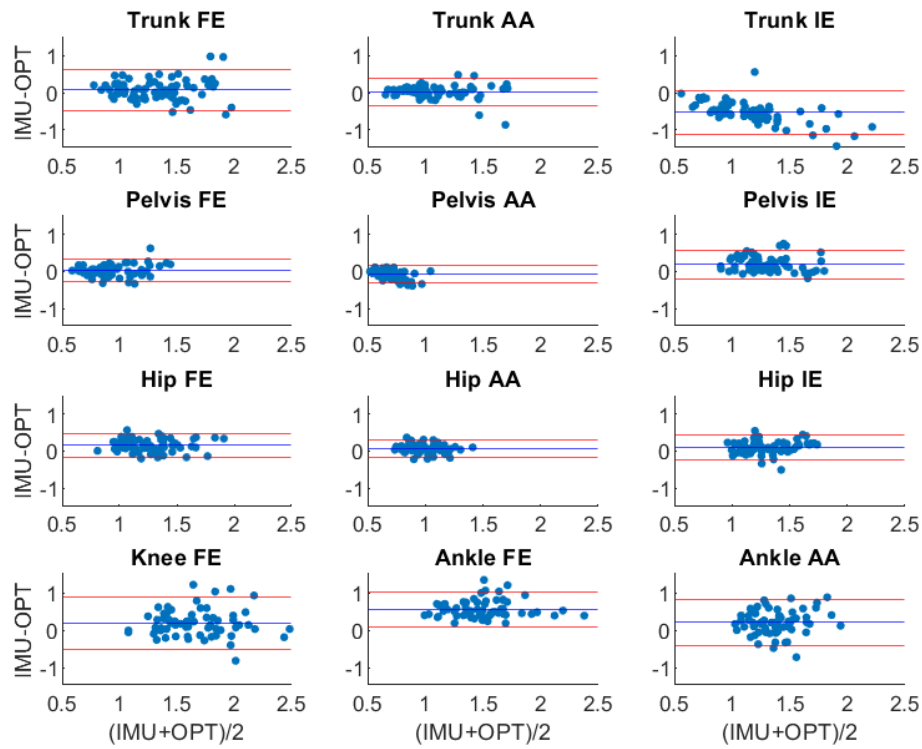

Figure S6. Bland-Altman plots of mean standard deviation (meanSD) of trunk, pelvis, and lower-limb joint angles for the optoelectronic-driven (OPT) and IMU-driven biomechanical models of constant-speed treadmill gait. Mean bias (blue line) and 95% limits of agreement (red lines) are shown. Values are in degrees ( $^{\circ}$ ). Angles include flexion/extension (FE), abduction/adduction (AA), and internal/external rotation (IE).

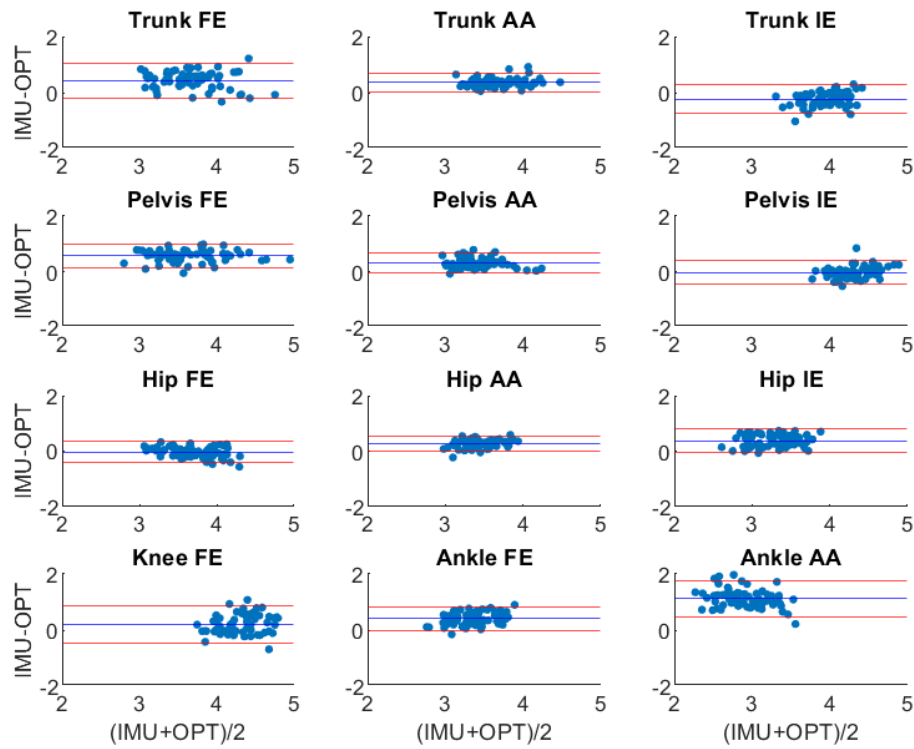

Figure S7. Bland-Altman plots of local divergence exponent ( $\lambda_{\max}$ ) of trunk, pelvis, and lower-limb joint angles for the optoelectronic-driven (OPT) and IMU-driven biomechanical models of constant-speed treadmill gait. Mean bias (blue line) and 95% limits of agreement (red lines) are shown. Values are in arbitrary units. Angles include flexion/extension (FE), abduction/adduction (AA), and internal/external rotation (IE).

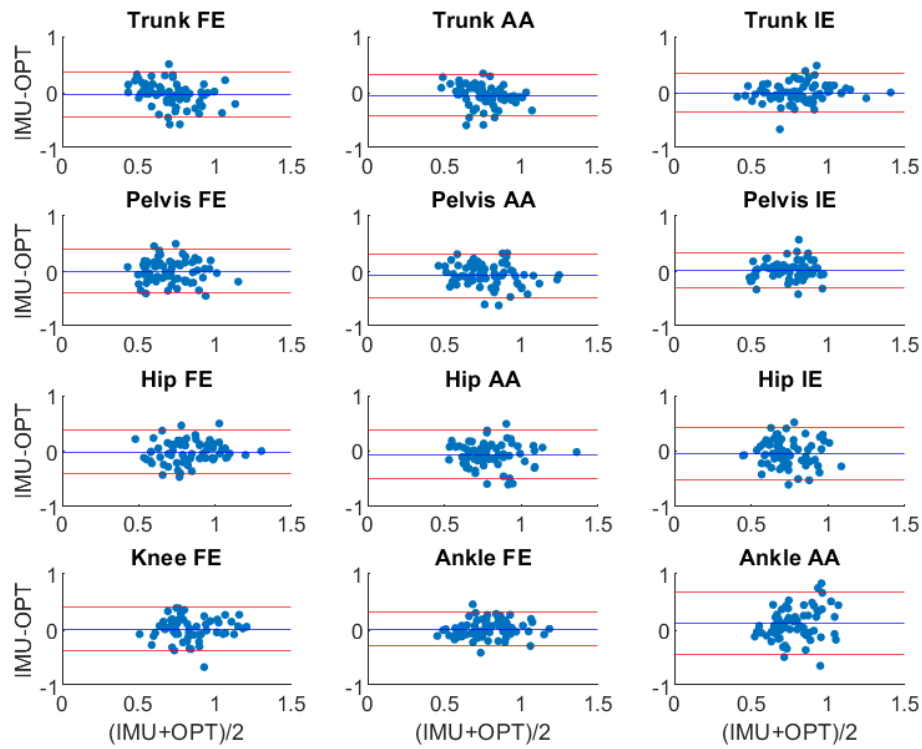

Figure S8. Bland-Altman plots of detrended fluctuation analysis scaling exponent (DFA $\alpha$ ) of range of motion of trunk, pelvis, and lower-limb joint angles for the optoelectronic-driven (OPT) and IMU-driven biomechanical models of constant-speed treadmill gait. Mean bias (blue line) and 95% limits of agreement (red lines) are shown. Values are in arbitrary units. Angles include flexion/extension (FE), abduction/adduction (AA), and internal/external rotation (IE).

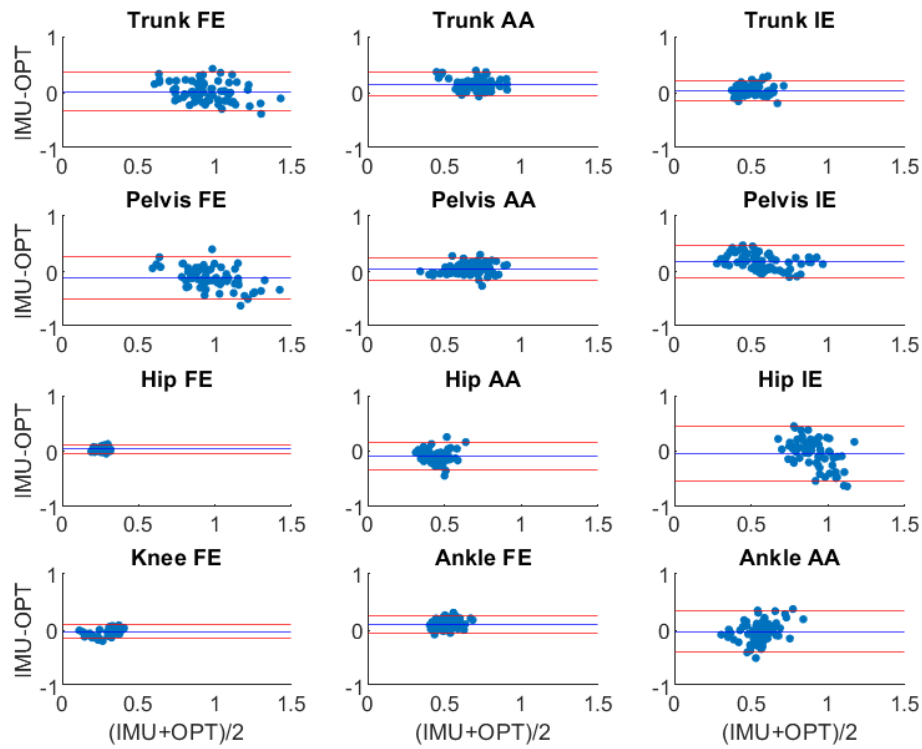

Figure S9. Bland-Altman plots of sample entropy (SaEn) of trunk, pelvis, and lower-limb joint angles for the optoelectronic-driven (OPT) and IMU-driven biomechanical models of constant-speed treadmill gait. Mean bias (blue line) and 95% limits of agreement (red lines) are shown. Values are in arbitrary units. Angles include flexion/extension (FE), abduction/adduction (AA), and internal/external rotation (IE).
