# Supplementary material for: Validity and Sensitivity of an Inertial Measurement Unit-Driven Biomechanical Model of Motor Variability for Gait
Source: MDPI journal article supplement (doi:10.3390/s21227690), 2021-11-19
Supplement: s1 [file s1]

## **Supplementary Videos S1–S4: Animations of the optoelectronic-based and IMU-based biomechanical models for preferred speed and arm swing gait in a representative subject**

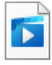

OPT\_sagittal.webm

*Video S1. Sagittal-plane view of the optoelectronic-based biomechanical model with spherical markers. Upper-limb bones and markers and lower-limb muscles have been hidden for visual clarity. Preferred speed and arm swing gait is shown for a representative participant.*

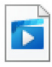

OPT\_front.webm

*Video S2. Frontal-plane view of the optoelectronic-based biomechanical model with spherical markers. Upper-limb bones and markers and lower-limb muscles have been hidden for visual clarity. Preferred speed and arm swing gait is shown for a representative participant.*

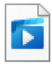

IMU\_sagittal.webm

*Video S3. Sagittal-plane view of the IMU-based biomechanical model with IMUs in the segment frame. Upper-limb bones and lower-limb muscles have been hidden for visual clarity. Preferred speed and arm swing gait is shown for a representative participant.*

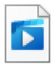

IMU\_front.webm

*Video S4. Frontal-plane view of the IMU-based biomechanical model with IMUs in the segment frame. Upper-limb bones and lower-limb muscles have been hidden for visual clarity. Preferred speed and arm swing gait is shown for a representative participant.*
