# Supplementary material for: Validity and Sensitivity of an Inertial Measurement Unit-Driven Biomechanical Model of Motor Variability for Gait
Source: MDPI journal article supplement (doi:10.3390/s21227690), 2021-11-19
Supplement: s1 [file s1]

**Supplementary Tables S1 and S2: Summarized optoelectronic- and IMU-based joint angle outcome data and sensitivity to gait speed and arm swing differences**

Table S1. Means [95% confidence interval] for optoelectronic-based model outcomes across gait conditions. Outcomes are range of motion (ROM), mean standard deviation (meanSD), local divergence exponent ( $\lambda_{max}$ ), detrended fluctuation analysis scaling exponent of range of motion (DFA $\alpha$ ), and sample entropy (SaEn). P-values from repeated measures ANOVAs for effects of Speed and Swing are provided.

| Angle           |                              | Gait condition                   | 70% preferred speed, preferred swing | 130% preferred speed, preferred swing | Preferred speed, active swing | Preferred speed, arms bound | P-value |         |
|-----------------|------------------------------|----------------------------------|--------------------------------------|---------------------------------------|-------------------------------|-----------------------------|---------|---------|
|                 |                              | Preferred speed, preferred swing |                                      |                                       |                               |                             | Speed   | Swing   |
| ROM             | Trunk FE <sup>2</sup>        | 6.5 [5.5,7.5]                    | 6.5 [5.6,7.5]                        | 6.4 [5.0,7.8]                         | 7.3 [6.6,8.0]                 | 5.9 [5.0-6.8]               | 0.91    | 0.003   |
|                 | Trunk AA <sup>a,b,2</sup>    | 16.9 [14.8,19.0]                 | 14.3 [11.5,17.1]                     | 18.7 [16.8,20.6]                      | 17.1 [14.9,19.2]              | 14.0 [11.9,16.1]            | < 0.001 | < 0.001 |
|                 | Trunk IE <sup>a,b,2</sup>    | 17.4 [14.9,19.9]                 | 13.9 [11.9,16.0]                     | 20.4 [17.3,23.5]                      | 22.2 [17.3,27.1]              | 12.7 [10.5,14.9]            | < 0.001 | < 0.001 |
|                 | Pelvis FE                    | 4.8 [3.8,5.7]                    | 4.7 [3.9,5.4]                        | 4.8 [3.4,6.1]                         | 5.3 [4.6,5.9]                 | 4.6 [3.6,5.5]               | 0.91    | < 0.001 |
|                 | Pelvis AA <sup>a,b,2</sup>   | 12.9 [11.0,14.7]                 | 10.8 [8.4,13.2]                      | 14.4 [12.8,16.1]                      | 13.2 [11.5,14.9]              | 10.4 [8.7,12.1]             | < 0.001 | 0.022   |
|                 | Pelvis IE <sup>a,b,1,2</sup> | 10.0 [8.7,11.4]                  | 8.7 [7.4,10.1]                       | 12.7 [10.8,14.6]                      | 11.7 [9.8,13.5]               | 8.5 [6.5,10.5]              | < 0.001 | < 0.001 |
|                 | Hip FE <sup>a,b,1</sup>      | 43.2 [40.6,45.8]                 | 37.9 [35.7,40.1]                     | 48.8 [46.1,51.4]                      | 46.2 [43.6,48.8]              | 43.4 [40.6,46.2]            | < 0.001 | < 0.001 |
|                 | Hip AA <sup>b,2</sup>        | 18.6 [16.6,20.7]                 | 17.0 [14.2,19.7]                     | 20.3 [18.7,21.9]                      | 19.2 [17.1,21.4]              | 15.8 [14.1,17.5]            | < 0.001 | < 0.001 |
|                 | Hip IE <sup>a,b</sup>        | 12.6 [10.5,14.8]                 | 11.3 [9.25,13.2]                     | 13.7 [11.3,16.2]                      | 12.3 [9.8,14.8]               | 12.0 [10.0,13.9]            | < 0.001 | < 0.001 |
|                 | Knee FE <sup>a,1</sup>       | 64.0 [61.1,67.0]                 | 60.9 [57.7,64.1]                     | 63.9 [60.7,67.1]                      | 61.2 [58.0,64.3]              | 63.7 [60.7,66.7]            | < 0.001 | 0.28    |
|                 | Ankle FE <sup>a,b</sup>      | 33.5 [28.4,36.5]                 | 27.3 [23.6,31.0]                     | 35.3 [32.0,38.6]                      | 32.3 [27.5,37.1]              | 33.6 [29.1,38.2]            | < 0.001 | < 0.001 |
| meanSD          | Ankle AA <sup>a,b</sup>      | 20.6 [18.6,22.5]                 | 19.2 [17.7,20.6]                     | 21.8 [19.6,23.9]                      | 21.0 [19.0,23.0]              | 20.7 [19.0,22.4]            | 0.001   | 0.007   |
|                 | Trunk FE                     | 1.28 [1.07,1.49]                 | 1.31 [1.13,1.49]                     | 1.30 [1.12,1.48]                      | 1.53 [1.29,1.77]              | 1.21 [1.03,1.39]            | 0.75    | 0.003   |
|                 | Trunk AA <sup>a,1,2</sup>    | 1.05 [0.90,1.20]                 | 1.18 [0.98,1.37]                     | 1.05 [0.89,1.20]                      | 1.34 [1.11,1.57]              | 0.87 [0.76,0.98]            | 0.002   | < 0.001 |
|                 | Trunk IE <sup>1,2</sup>      | 1.46 [1.29,1.62]                 | 1.34 [1.20,1.48]                     | 1.51 [1.32,1.69]                      | 2.10 [1.84,2.37]              | 1.10 [0.96,1.24]            | 0.005   | < 0.001 |
|                 | Pelvis FE <sup>a,1</sup>     | 0.83 [0.68,0.99]                 | 0.99 [0.87,1.11]                     | 0.82 [0.71,0.94]                      | 0.95 [0.84,1.06]              | 0.87 [0.74,0.99]            | 0.001   | 0.004   |
|                 | Pelvis AA <sup>a,1</sup>     | 0.67 [0.57,0.78]                 | 0.78 [0.67,0.88]                     | 0.67 [0.58,0.76]                      | 0.79 [0.69,0.88]              | 0.65 [0.55,0.74]            | 0.001   | < 0.001 |
|                 | Pelvis IE <sup>b,1,2</sup>   | 1.15 [0.99,1.31]                 | 1.27 [1.13,1.41]                     | 1.00 [0.88,1.13]                      | 1.28 [1.11,1.46]              | 1.30 [1.16,1.45]            | < 0.001 | 0.004   |
|                 | Hip FE <sup>a</sup>          | 1.14 [0.94,1.33]                 | 1.37 [1.22,1.51]                     | 1.08 [0.95,1.20]                      | 1.29 [1.15,1.42]              | 1.17 [1.03,1.31]            | < 0.001 | 0.008   |
|                 | Hip AA <sup>a,1</sup>        | 0.92 [0.81,1.03]                 | 1.03 [0.92,1.14]                     | 0.94 [0.84,1.04]                      | 1.06 [0.96,1.16]              | 0.92 [0.83,1.02]            | 0.002   | < 0.001 |
|                 | Hip IE <sup>b,1</sup>        | 1.24 [1.10,1.38]                 | 1.29 [1.16,1.41]                     | 1.16 [1.05,1.27]                      | 1.39 [1.28,1.50]              | 1.27 [1.11,1.43]            | 0.018   | 0.002   |
|                 | Knee FE <sup>a</sup>         | 1.54 [1.26,1.81]                 | 1.89 [1.67,2.11]                     | 1.38 [1.23,1.53]                      | 1.67 [1.51,1.83]              | 1.52 [1.36,1.68]            | < 0.001 | 0.033   |
| $\lambda_{max}$ | Ankle FE <sup>1</sup>        | 1.21 [0.97,1.45]                 | 1.30 [1.16,1.43]                     | 1.12 [1.00,1.25]                      | 1.39 [1.23,1.56]              | 1.22 [1.04,1.41]            | 0.026   | 0.001   |
|                 | Ankle AA <sup>a,b</sup>      | 1.32 [1.12,1.52]                 | 1.34 [1.21,1.48]                     | 1.18 [1.07,1.29]                      | 1.39 [1.27,1.51]              | 1.28 [1.14,1.43]            | 0.007   | 0.090   |
|                 | Trunk FE <sup>a,b,1</sup>    | 3.37 [3.11,3.62]                 | 3.78 [3.55,4.00]                     | 3.16 [2.93,3.38]                      | 3.66 [3.45,3.87]              | 3.33 [3.08,3.59]            | < 0.001 | < 0.001 |
|                 | Trunk AA <sup>a,1,2</sup>    | 3.46 [3.33,3.59]                 | 3.74 [3.57,3.91]                     | 3.33 [3.20,3.45]                      | 3.65 [3.52,3.75]              | 3.27 [3.11,3.44]            | < 0.001 | < 0.001 |
|                 | Trunk IE <sup>1,2</sup>      | 4.06 [3.97,4.15]                 | 4.12 [4.02,4.21]                     | 4.01 [3.91,4.11]                      | 4.34 [4.23,4.45]              | 3.80 [3.66,3.93]            | 0.007   | < 0.001 |
|                 | Pelvis FE <sup>a,b,1</sup>   | 3.21 [2.93,3.49]                 | 3.72 [3.47,3.97]                     | 3.02 [2.83,3.22]                      | 3.50 [3.27,3.73]              | 3.25 [3.02,3.48]            | < 0.001 | < 0.001 |
|                 | Pelvis AA <sup>a,b,1</sup>   | 3.21 [3.01,3.40]                 | 3.54 [3.39,3.69]                     | 3.08 [2.92,3.24]                      | 3.37 [3.22,3.52]              | 3.12 [2.91,3.34]            | < 0.001 | < 0.001 |

|                               |                            |                  |                  |                  |                  |                  |         |         |
|-------------------------------|----------------------------|------------------|------------------|------------------|------------------|------------------|---------|---------|
| <b>DFA<math>\alpha</math></b> | Pelvis IE <sup>a,1,2</sup> | 4.15 [4.04,4.26] | 4.37 [4.24,4.51] | 4.16 [4.05,4.28] | 4.50 [4.40,4.60] | 4.41 [4.30,4.52] | 0.001   | < 0.001 |
|                               | Hip FE <sup>a,1</sup>      | 3.60 [3.36,3.83] | 3.97 [3.83,4.11] | 3.48 [3.31,3.65] | 3.80 [3.60,4.00] | 3.67 [3.43,3.90] | < 0.001 | 0.006   |
|                               | Hip AA <sup>a,b,1</sup>    | 3.24 [3.11,3.36] | 3.53 [3.43,3.63] | 3.14 [3.02,3.25] | 3.42 [3.32,3.52] | 3.28 [3.14,3.41] | < 0.001 | < 0.001 |
|                               | Hip IE <sup>a,b,1,2</sup>  | 2.99 [2.83,3.15] | 3.33 [3.19,3.47] | 2.76 [2.66,2.87] | 3.24 [3.14,3.33] | 3.08 [2.92,3.23] | < 0.001 | 0.002   |
|                               | Knee FE <sup>a,1</sup>     | 4.11 [3.97,4.24] | 4.59 [4.49,4.70] | 3.95 [3.83,4.07] | 4.24 [4.11,4.38] | 4.10 [4.01,4.20] | < 0.001 | 0.004   |
|                               | Ankle FE <sup>a,1</sup>    | 3.04 [2.92,3.16] | 3.37 [3.26,3.48] | 2.94 [2.83,3.05] | 3.29 [3.15,3.43] | 3.11 [2.99,3.22] | < 0.001 | < 0.001 |
|                               | Ankle AA <sup>a,b</sup>    | 2.36 [2.09,2.64] | 2.71 [2.53,2.88] | 2.02 [1.85,2.18] | 2.42 [2.24,2.61] | 2.22 [2.02,2.41] | < 0.001 | 0.068   |
|                               | Trunk FE                   | 0.68 [0.53,0.84] | 0.68 [0.59,0.78] | 0.69 [0.58,0.81] | 0.83 [0.68,0.99] | 0.68 [0.55,0.81] | 0.96    | 0.12    |
|                               | Trunk AA                   | 0.74 [0.62,0.86] | 0.78 [0.68,0.87] | 0.71 [0.61,0.80] | 0.82 [0.72,0.92] | 0.89 [0.81,0.98] | 0.58    | 0.26    |
|                               | Trunk IE                   | 0.77 [0.61,0.92] | 0.81 [0.68,0.95] | 0.80 [0.71,0.88] | 0.79 [0.67,0.92] | 0.83 [0.72,0.93] | 0.81    | 0.61    |
|                               | Pelvis FE                  | 0.67 [0.54,0.79] | 0.64 [0.55,0.72] | 0.75 [0.66,0.84] | 0.80 [0.67,0.92] | 0.71 [0.60,0.83] | 0.14    | 0.32    |
|                               | Pelvis AA                  | 0.86 [0.74,0.97] | 0.86 [0.73,0.99] | 0.74 [0.64,0.83] | 0.84 [0.67,1.00] | 0.85 [0.71,1.00] | 0.13    | 0.90    |
|                               | Pelvis IE                  | 0.67 [0.59,0.75] | 0.71 [0.62,0.80] | 0.74 [0.65,0.83] | 0.79 [0.70,0.88] | 0.68 [0.60,0.76] | 0.66    | 0.063   |
|                               | Hip FE                     | 0.78 [0.66,0.90] | 0.82 [0.70,0.93] | 0.84 [0.73,0.95] | 0.92 [0.80,1.03] | 0.84 [0.73,0.96] | 0.76    | 0.15    |
|                               | Hip AA                     | 0.85 [0.72,0.99] | 0.84 [0.69,0.98] | 0.74 [0.65,0.82] | 0.84 [0.73,0.96] | 0.87 [0.73,1.00] | 0.12    | 0.91    |
|                               | Hip IE                     | 0.71 [0.61,0.81] | 0.77 [0.64,0.89] | 0.69 [0.59,0.78] | 0.83 [0.74,0.93] | 0.79 [0.66,0.92] | 0.49    | 0.21    |
|                               | Knee FE                    | 0.79 [0.65,0.93] | 0.83 [0.72,0.94] | 0.82 [0.72,0.92] | 0.83 [0.73,0.94] | 0.86 [0.76,0.97] | 0.92    | 0.64    |
|                               | Ankle FE                   | 0.79 [0.67,0.92] | 0.71 [0.59,0.82] | 0.79 [0.72,0.85] | 0.76 [0.68,0.85] | 0.80 [0.68,0.92] | 0.41    | 1.00    |
|                               | Ankle AA                   | 0.73 [0.66,0.81] | 0.70 [0.62,0.79] | 0.69 [0.57,0.80] | 0.78 [0.66,0.90] | 0.74 [0.62,0.85] | 0.54    | 0.71    |
| <b>SaEn</b>                   | Trunk FE <sup>a,b,1</sup>  | 0.96 [0.84,1.09] | 0.83 [0.75,0.90] | 1.09 [0.93,1.25] | 0.85 [0.76,0.95] | 0.98 [0.85,1.10] | < 0.001 | < 0.001 |
|                               | Trunk AA                   | 0.62 [0.54,0.69] | 0.60 [0.53,0.68] | 0.64 [0.56,0.71] | 0.62 [0.53,0.71] | 0.66 [0.57,0.75] | 0.399   | 0.12    |
|                               | Trunk IE <sup>a,b,2</sup>  | 0.47 [0.42,0.51] | 0.50 [0.45,0.55] | 0.45 [0.40,0.50] | 0.49 [0.43,0.56] | 0.51 [0.47,0.55] | 0.001   | 0.12    |
|                               | Pelvis FE <sup>a,1</sup>   | 1.06 [0.90,1.21] | 0.92 [0.83,1.01] | 1.17 [0.99,1.34] | 0.95 [0.82-1.08] | 1.06 [0.92,1.21] | < 0.001 | 0.001   |
|                               | Pelvis AA <sup>2</sup>     | 0.62 [0.55,0.69] | 0.63 [0.55,0.72] | 0.60 [0.54,0.67] | 0.62 [0.55-0.69] | 0.68 [0.59,0.77] | 0.49    | 0.005   |
|                               | Pelvis IE <sup>b,1</sup>   | 0.47 [0.35,0.59] | 0.56 [0.46,0.66] | 0.36 [0.25,0.46] | 0.38 [0.28-0.49] | 0.61 [0.48,0.74] | 0.002   | < 0.001 |
|                               | Hip FE <sup>2</sup>        | 0.23 [0.21,0.25] | 0.24 [0.22,0.25] | 0.24 [0.22,0.26] | 0.24 [0.22-0.25] | 0.25 [0.22,0.27] | 0.56    | 0.10    |
|                               | Hip AA                     | 0.48 [0.43,0.53] | 0.47 [0.40,0.53] | 0.50 [0.45,0.55] | 0.48 [0.42-0.54] | 0.52 [0.45,0.59] | 0.24    | 0.025   |
|                               | Hip IE <sup>a</sup>        | 0.94 [0.80,1.08] | 0.82 [0.70,0.93] | 1.00 [0.88,1.11] | 0.94 [0.81-1.07] | 0.93 [0.81,1.05] | < 0.001 | 0.95    |
|                               | Knee FE                    | 0.32 [0.28,0.36] | 0.26 [0.20,0.31] | 0.34 [0.32,0.37] | 0.32 [0.28-0.36] | 0.32 [0.29,0.35] | 0.005   | 0.90    |
|                               | Ankle FE <sup>1</sup>      | 0.45 [0.40,0.49] | 0.46 [0.42,0.49] | 0.46 [0.42,0.49] | 0.49 [0.45-0.54] | 0.43 [0.39,0.47] | 0.67    | < 0.001 |
|                               | Ankle AA                   | 0.47 [0.49,0.64] | 0.53 [0.47,0.59] | 0.58 [0.52,0.65] | 0.59 [0.51-0.66] | 0.57 [0.51,0.64] | 0.054   | 0.65    |

FE: flexion/extension; AA: abduction/adduction; IE: internal/external rotation

<sup>a</sup> post-hoc difference between preferred speed and 70% preferred speed ( $p < 0.05$ )

<sup>b</sup> post-hoc difference between preferred speed and 130% preferred speed ( $p < 0.05$ )

<sup>1</sup> post-hoc difference between preferred swing and active swing ( $p < 0.05$ )

<sup>2</sup> post-hoc difference between preferred swing and bound swing ( $p < 0.05$ )

Table S2. Means [95% confidence interval] for IMU-based model outcomes across gait conditions. Outcomes are range of motion (ROM), mean standard deviation (meanSD), local divergence exponent ( $\lambda_{max}$ ), detrended fluctuation analysis scaling exponent of range of motion (DFA $\alpha$ ), and sample entropy (SaEn). P-values from repeated measures P-values from repeated measures ANOVAs for effects of Speed and Swing are provided.

|                                   | Angle                        | Gait condition                   |                                      |                                       |                               |                              | P-value |         |
|-----------------------------------|------------------------------|----------------------------------|--------------------------------------|---------------------------------------|-------------------------------|------------------------------|---------|---------|
|                                   |                              | Preferred speed, preferred swing | 70% preferred speed, preferred swing | 130% preferred speed, preferred swing | Preferred speed, active swing | Preferred speed, bound swing | Speed   | Swing   |
| <b>ROM</b>                        | Trunk FE                     | 5.4 [4.5,6.3]                    | 6.0 [5.0,6.9]                        | 5.3 [4.5,6.0]                         | 5.3 [4.5,6.1]                 | 4.7 [4.1,5.3]                | 0.014   | 0.02    |
|                                   | Trunk AA <sup>a,b</sup>      | 10.0 [9.1,11.0]                  | 7.9 [6.9,9.0]                        | 11.6 [10.2,13.1]                      | 8.5 [7.7,9.3]                 | 8.4 [7.7,9.0]                | 0.001   | 0.069   |
|                                   | Trunk IE <sup>a,b,1,2</sup>  | 10.1 [8.6,11.7]                  | 7.8 [6.3,9.2]                        | 12.7 [10.5,14.8]                      | 15.5 [12.3,18.7]              | 6.4 [5.4,7.3]                | 0.002   | < 0.001 |
|                                   | Pelvis FE                    | 4.5 [4.1,4.8]                    | 4.5 [4.1,5.0]                        | 4.9 [4.5,5.3]                         | 4.1 [3.6,4.5]                 | 4.4 [4.1,4.7]                | < 0.001 | 0.46    |
|                                   | Pelvis AA <sup>a,b,2</sup>   | 8.7 [7.6,9.7]                    | 7.3 [6.2,8.5]                        | 10.0 [8.7,11.2]                       | 8.1 [7.0,9.2]                 | 7.7 [6.7,8.6]                | 0.006   | 0.001   |
|                                   | Pelvis IE <sup>b,1</sup>     | 9.3 [7.4,11.2]                   | 8.5 [6.7,10.2]                       | 12.0 [9.2,14.8]                       | 11.4 [9.3,13.6]               | 8.4 [6.1,10.7]               | < 0.001 | 0.003   |
|                                   | Hip FE <sup>a,b,1</sup>      | 43.5 [41.1,45.9]                 | 39.6 [37.5,41.6]                     | 47.5 [45.3,49.7]                      | 45.7 [43.3,48.2]              | 43.6 [41.3,45.9]             | < 0.001 | 0.001   |
|                                   | Hip AA <sup>a,b</sup>        | 25.5 [22.6,28.4]                 | 22.6 [19.7,25.4]                     | 26.9 [24.0,29.8]                      | 25.7 [22.8,28.6]              | 24.2 [21.8,26.5]             | < 0.001 | 0.15    |
|                                   | Hip IE <sup>a,b</sup>        | 12.4 [11.1,13.8]                 | 10.7 [9.9,11.4]                      | 14.3 [12.8,15.7]                      | 13.8 [12.1,15.4]              | 12.8 [10.8,14.9]             | 0.32    | 0.18    |
|                                   | Knee FE <sup>1</sup>         | 62.3 [58.9,65.8]                 | 61.6 [57.3,65.9]                     | 60.0 [56.7,63.2]                      | 60.5 [56.9,64.0]              | 62.2 [58.5,66.0]             | < 0.001 | 0.016   |
|                                   | Ankle FE <sup>a,b</sup>      | 31.5 [27.9,35.1]                 | 26.9 [24.3,29.4]                     | 34.3 [30.6,38.0]                      | 30.6 [26.7,34.4]              | 31.6 [27.6,35.7]             | 0.083   | 0.19    |
|                                   | Ankle AA                     | 22.9 [18.0,27.7]                 | 20.0 [16.1,23.9]                     | 24.4 [19.6,29.3]                      | 24.9 [20.3,29.5]              | 26.4 [21.8,31.1]             | 0.73    | 0.32    |
| <b>meanSD</b>                     | Trunk FE                     | 1.34 [1.13,1.55]                 | 1.40 [1.17,1.64]                     | 1.39 [1.18,1.59]                      | 1.46 [1.23,1.69]              | 1.34 [1.09,1.58]             | 0.72    | 0.02    |
|                                   | Trunk AA <sup>1</sup>        | 1.10 [0.95,1.25]                 | 1.14 [0.96,1.33]                     | 1.13 [0.97,1.30]                      | 1.22 [1.09,1.35]              | 0.96 [0.79,1.12]             | 0.55    | 0.001   |
|                                   | Trunk IE                     | 0.86 [0.75,0.97]                 | 0.81 [0.69,0.93]                     | 0.93 [0.78,1.08]                      | 1.26 [1.09,1.43]              | 0.71 [0.62,0.79]             | 0.03    | 0.13    |
|                                   | Pelvis FE                    | 0.91 [0.74,1.09]                 | 1.06 [0.87,1.24]                     | 0.83 [0.73,0.94]                      | 0.98 [0.87,1.09]              | 0.92 [0.75,1.09]             | 0.008   | 0.12    |
|                                   | Pelvis AA <sup>1</sup>       | 0.61 [0.56,0.66]                 | 0.64 [0.58,0.71]                     | 0.62 [0.56,0.68]                      | 0.67 [0.63,0.71]              | 0.58 [0.53,0.64]             | 0.33    | 0.003   |
|                                   | Pelvis IE <sup>1</sup>       | 1.33 [1.23,1.43]                 | 1.40 [1.29,1.52]                     | 1.31 [1.22,1.40]                      | 1.61 [1.48,1.73]              | 1.40 [1.29,1.51]             | 0.028   | < 0.001 |
|                                   | Hip FE                       | 1.30 [1.11,1.49]                 | 1.43 [1.29,1.57]                     | 1.23 [1.09,1.37]                      | 1.52 [1.35,1.68]              | 1.33 [1.18,1.48]             | 0.022   | 0.12    |
|                                   | Hip AA <sup>1</sup>          | 1.01 [0.92,1.09]                 | 1.01 [0.92,1.09]                     | 0.99 [0.89,1.08]                      | 1.16 [1.07,1.25]              | 1.02 [0.92,1.11]             | 0.90    | 0.23    |
|                                   | Hip IE <sup>a,1</sup>        | 1.30 [1.12,1.48]                 | 1.39 [1.26,1.52]                     | 1.26 [1.15,1.37]                      | 1.60 [1.48,1.71]              | 1.33 [1.19,1.46]             | 0.002   | 0.62    |
|                                   | Knee FE                      | 1.69 [1.43,1.95]                 | 1.92 [1.68,2.16]                     | 1.52 [1.39,1.66]                      | 1.89 [1.65,2.13]              | 1.78 [1.59,1.97]             | 0.004   | 0.28    |
|                                   | Ankle FE                     | 1.77 [1.55,1.99]                 | 1.86 [1.72,2.00]                     | 1.67 [1.55,1.78]                      | 2.02 [1.88,2.16]              | 1.78 [1.60,1.96]             | 0.036   | 0.042   |
|                                   | Ankle AA <sup>1</sup>        | 1.44 [1.24,1.63]                 | 1.54 [1.35,1.74]                     | 1.38 [1.26,1.50]                      | 1.64 [1.43,1.85]              | 1.42 [1.27,1.56]             | 0.001   | 0.003   |
| <b><math>\lambda_{max}</math></b> | Trunk FE <sup>a,b,1</sup>    | 3.81 [3.62,4.00]                 | 4.27 [4.04,4.49]                     | 3.50 [3.34,3.66]                      | 4.04 [3.86,4.21]              | 3.90 [3.69,4.11]             | < 0.001 | 0.008   |
|                                   | Trunk AA <sup>a,b</sup>      | 3.82 [3.68,3.96]                 | 4.18 [4.03,4.33]                     | 3.58 [3.45,3.71]                      | 3.93 [3.77,4.09]              | 3.73 [3.55,3.91]             | < 0.001 | 0.016   |
|                                   | Trunk IE <sup>a,b,2</sup>    | 3.84 [3.72,3.97]                 | 4.15 [4.03,4.27]                     | 3.59 [3.43,3.74]                      | 3.93 [3.75,4.11]              | 3.57 [3.53,3.82]             | < 0.001 | 0.008   |
|                                   | Pelvis FE <sup>a,b,1,2</sup> | 3.79 [3.56,4.03]                 | 4.29 [4.07,4.52]                     | 3.50 [3.31,3.70]                      | 4.06 [3.82,4.31]              | 3.94 [3.71,4.17]             | < 0.001 | 0.005   |
|                                   | Pelvis AA <sup>a,b,1,2</sup> | 3.51 [3.36,3.67]                 | 3.87 [3.77,3.98]                     | 3.28 [3.14,3.43]                      | 3.63 [3.49,3.77]              | 3.60 [3.48,3.73]             | < 0.001 | 0.007   |
|                                   | Pelvis IE <sup>a,b,1,2</sup> | 4.13 [4.00,4.27]                 | 4.55 [4.42,4.68]                     | 4.00 [3.87,4.13]                      | 4.41 [4.28,4.53]              | 4.30 [4.13,4.48]             | < 0.001 | < 0.001 |
|                                   | Hip FE <sup>a,b</sup>        | 3.66 [3.49,3.84]                 | 4.08 [3.96,4.21]                     | 3.42 [3.30,3.53]                      | 3.77 [3.61,3.92]              | 3.70 [3.54,3.85]             | < 0.001 | 0.17    |
|                                   | Hip AA <sup>a,b,1</sup>      | 3.49 [3.37,3.61]                 | 3.82 [3.74,3.91]                     | 3.28 [3.15,3.40]                      | 3.64 [3.50,3.78]              | 3.53 [3.38,3.67]             | < 0.001 | 0.31    |
|                                   | Hip IE <sup>a,b,1</sup>      | 3.39 [3.23,3.55]                 | 3.73 [3.53,3.83]                     | 3.18 [3.02,3.34]                      | 3.61 [3.51,3.72]              | 3.38 [3.21,3.55]             | < 0.001 | 0.55    |
|                                   | Knee FE <sup>a</sup>         | 4.32 [4.11,4.53]                 | 4.67 [4.50,4.84]                     | 4.01 [3.87,4.14]                      | 4.29 [4.10,4.48]              | 4.24 [4.12,4.37]             | < 0.001 | 0.28    |
|                                   | Ankle FE <sup>a,b,1</sup>    | 3.49 [3.37,3.62]                 | 3.89 [3.78,3.99]                     | 3.28 [3.15,3.41]                      | 3.69 [3.55,3.82]              | 3.49 [3.38,3.60]             | < 0.001 | 0.001   |

|             |                          |                  |                  |                  |                  |                  |         |         |
|-------------|--------------------------|------------------|------------------|------------------|------------------|------------------|---------|---------|
| <b>DFAα</b> | Ankle AA <sup>a,b</sup>  | 3.44 [3.32,3.56] | 3.77 [3.65,3.89] | 3.19 [3.07,3.32] | 3.61 [3.49,3.74] | 3.48 [3.33,3.64] | < 0.001 | 0.034   |
|             | Trunk FE                 | 0.69 [0.61,0.77] | 0.70 [0.59,0.81] | 0.65 [0.58,0.72] | 0.67 [0.56,0.78] | 0.69 [0.60,0.78] | 0.72    | 0.94    |
|             | Trunk AA <sup>2</sup>    | 0.67 [0.61,0.73] | 0.74 [0.67,0.81] | 0.73 [0.64,0.83] | 0.70 [0.61,0.79] | 0.85 [0.79,0.92] | 0.20    | 0.003   |
|             | Trunk IE                 | 0.78 [0.63,0.93] | 0.78 [0.64,0.93] | 0.82 [0.71,0.92] | 0.83 [0.67,1.00] | 0.79 [0.67,0.90] | 0.59    | 0.61    |
|             | Pelvis FE                | 0.69 [0.58,0.80] | 0.66 [0.53,0.79] | 0.71 [0.63,0.79] | 0.75 [0.64,0.85] | 0.74 [0.63,0.84] | 0.90    | 0.54    |
|             | Pelvis AA                | 0.80 [0.69,0.91] | 0.84 [0.76,0.92] | 0.67 [0.57,0.78] | 0.77 [0.65,0.89] | 0.72 [0.61,0.83] | 0.046   | 0.45    |
|             | Pelvis IE                | 0.73 [0.59,0.86] | 0.73 [0.63,0.83] | 0.75 [0.65,0.85] | 0.81 [0.74,0.87] | 0.75 [0.65,0.84] | 0.95    | 0.47    |
|             | Hip FE                   | 0.86 [0.72,1.00] | 0.71 [0.59,0.83] | 0.84 [0.72,0.95] | 0.88 [0.76,1.00] | 0.82 [0.69,0.96] | 0.11    | 0.60    |
|             | Hip AA                   | 0.77 [0.63,0.92] | 0.77 [0.66,0.88] | 0.69 [0.57,0.81] | 0.85 [0.72,0.97] | 0.73 [0.67,0.80] | 0.28    | 0.37    |
|             | Hip IE                   | 0.67 [0.56,0.78] | 0.70 [0.60,0.81] | 0.75 [0.61,0.88] | 0.73 [0.65,0.81] | 0.73 [0.63,0.84] | 0.39    | 0.49    |
|             | Knee FE                  | 0.82 [0.70,0.94] | 0.91 [0.76,1.06] | 0.86 [0.76,0.96] | 0.81 [0.73,0.89] | 0.83 [0.71,0.96] | 0.68    | 0.83    |
|             | Ankle FE                 | 0.80 [0.66,0.94] | 0.77 [0.66,0.88] | 0.79 [0.69,0.89] | 0.79 [0.70,0.89] | 0.79 [0.65,0.93] | 0.74    | 0.91    |
| <b>SaEn</b> | Ankle AA                 | 0.84 [0.69,0.99] | 0.85 [0.70,1.00] | 0.97 [0.84,1.10] | 0.82 [0.69,0.94] | 0.75 [0.66,0.85] | 0.20    | 0.74    |
|             | Trunk FE <sup>a,b</sup>  | 0.97 [0.90,1.05] | 0.80 [0.74,0.86] | 1.11 [1.00,1.21] | 0.93 [0.85,1.01] | 0.97 [0.88,1.06] | < 0.001 | 0.27    |
|             | Trunk AA                 | 0.74 [0.68,0.80] | 0.73 [0.67,0.80] | 0.78 [0.71,0.86] | 0.82 [0.75,0.89] | 0.79 [0.73,0.84] | 0.27    | 0.20    |
|             | Trunk IE <sup>1,2</sup>  | 0.51 [0.48,0.55] | 0.54 [0.47,0.60] | 0.49 [0.44,0.53] | 0.44 [0.40,0.49] | 0.62 [0.57,0.67] | 0.09    | < 0.001 |
|             | Pelvis FE <sup>a,b</sup> | 0.93 [0.85,1.00] | 0.80 [0.73,0.87] | 1.00 [0.91,1.09] | 0.92 [0.82,1.01] | 0.88 [0.81,0.95] | < 0.001 | 0.50    |
|             | Pelvis AA                | 0.68 [0.60,0.76] | 0.67 [0.58,0.77] | 0.67 [0.59,0.74] | 0.70 [0.61,0.78] | 0.68 [0.59,0.76] | 0.69    | 0.89    |
|             | Pelvis IE                | 0.71 [0.62,0.79] | 0.64 [0.57,0.72] | 0.65 [0.56,0.74] | 0.64 [0.58,0.70] | 0.71 [0.59,0.84] | 0.12    | 0.20    |
|             | Hip FE                   | 0.27 [0.25,0.30] | 0.26 [0.23,0.28] | 0.30 [0.28,0.31] | 0.27 [0.24,0.29] | 0.28 [0.25,0.30] | 0.001   | 0.12    |
|             | Hip AA                   | 0.37 [0.33,0.42] | 0.39 [0.34,0.43] | 0.42 [0.35,0.49] | 0.40 [0.36,0.44] | 0.41 [0.34,0.48] | 0.076   | 0.36    |
|             | Hip IE                   | 0.92 [0.85,0.97] | 0.86 [0.79,0.92] | 0.91 [0.85,0.96] | 0.85 [0.79,0.90] | 0.91 [0.81,1.01] | 0.20    | 0.24    |
|             | Knee FE                  | 0.28 [0.23,0.34] | 0.22 [0.15,0.29] | 0.35 [0.32,0.37] | 0.31 [0.24,0.37] | 0.30 [0.24,0.35] | < 0.001 | 0.11    |
|             | Ankle FE <sup>1</sup>    | 0.55 [0.49,0.60] | 0.52 [0.48,0.55] | 0.57 [0.52,0.62] | 0.60 [0.54,0.65] | 0.54 [0.49,0.59] | 0.015   | 0.001   |
|             | Ankle AA                 | 0.56 [0.46,0.66] | 0.54 [0.47,0.62] | 0.57 [0.46,0.68] | 0.55 [0.43,0.67] | 0.46 [0.38,0.54] | 0.53    | 0.089   |

FE: flexion/extension; AA: abduction/adduction; IE: internal/external rotation

<sup>a</sup> post-hoc difference between preferred speed and 70% preferred speed ( $p < 0.05$ )

<sup>b</sup> post-hoc difference between preferred speed and 130% preferred speed ( $p < 0.05$ )

<sup>1</sup> post-hoc difference between preferred swing and active swing ( $p < 0.05$ )

<sup>2</sup> post-hoc difference between preferred swing and bound swing ( $p < 0.05$ )
