# Supplementary material for: Validity and Sensitivity of an Inertial Measurement Unit-Driven Biomechanical Model of Motor Variability for Gait
Source: MDPI journal article supplement (doi:10.3390/s21227690), 2021-11-19
Supplement: s1 [file s1]

**Supplementary Figure S3: Identification of heel strikes from optoelectronic- and IMU-**  
**modelled calcaneus linear velocities**

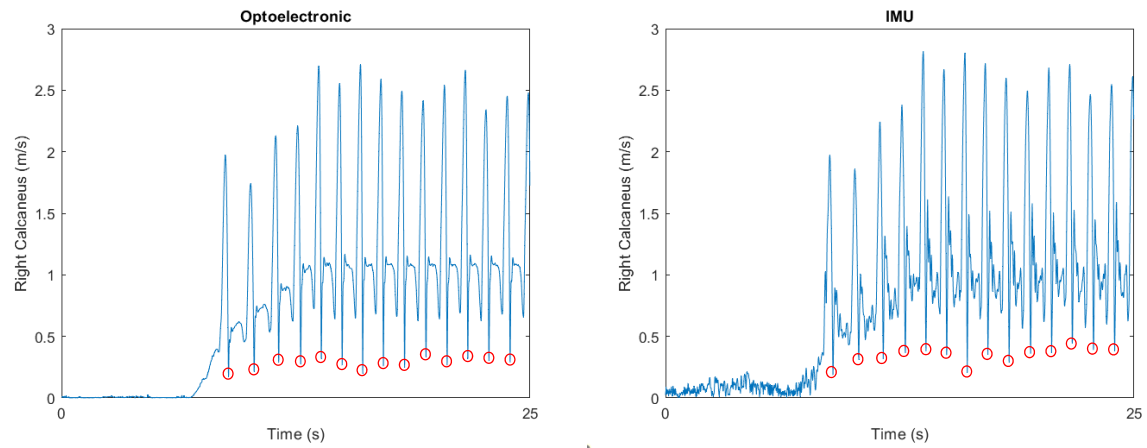

*Figure S3. Filtered Euclidean mean linear velocity of the right calcaneus from the optoelectronic (left) and inertial measurement unit (IMU; right) models of preferred speed and arm swing gait for a representative participant. Heel strike events (red circles) were identified as the local minima immediately following each local maximum.*
