# Supplementary material for: Validity and Sensitivity of an Inertial Measurement Unit-Driven Biomechanical Model of Motor Variability for Gait
Source: Sensors (Basel). 2021 Nov 19;21(22):7690. doi: 10.3390/s21227690 (PMC8626040; doi:10.3390/s21227690)
Supplement: Supplementary file 1 [file sensors-21-07690-s001.zip]

Archive with 11 entries (11 files):
- IMU_front.webm
- IMU_sagittal.webm
- OPT_front.webm
- OPT_sagittal.webm
- Supplementary Figure S1.pdf
- Supplementary Figure S2.pdf
- Supplementary Figure S3.pdf
- Supplementary Figure S4.pdf
- Supplementary Figures S5-S9.pdf
- Supplementary Tables S1 and S2.pdf
- Supplementary Videos S1-S4.pdf
